# Supplementary material for: Baicalein antagonizes rotenone-induced apoptosis in dopaminergic SH-SY5Y cells related to Parkinsonism
Source: Springer Nature journal article supplement (doi:10.1186/1749-8546-7-1), 2012-01-21
Supplement: Additional file 1 [file 1749-8546-7-1-s1.pdf]

Example: Fig. 2C

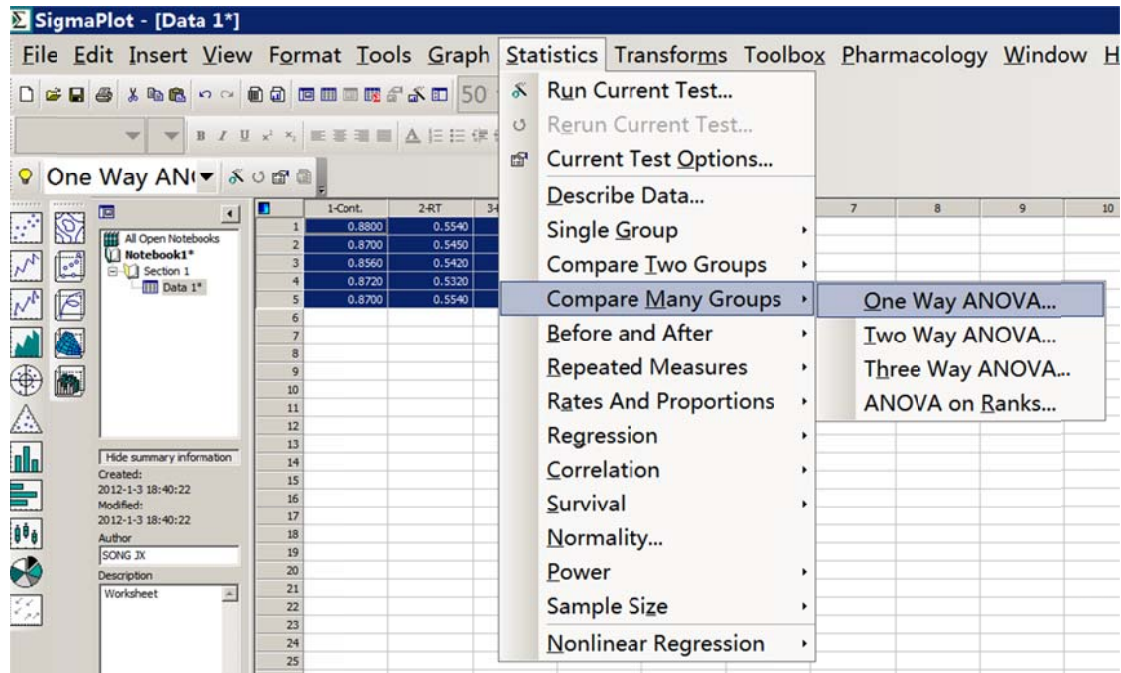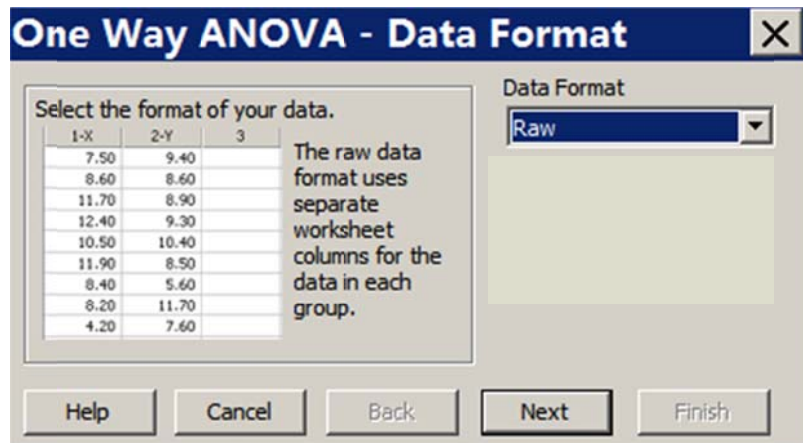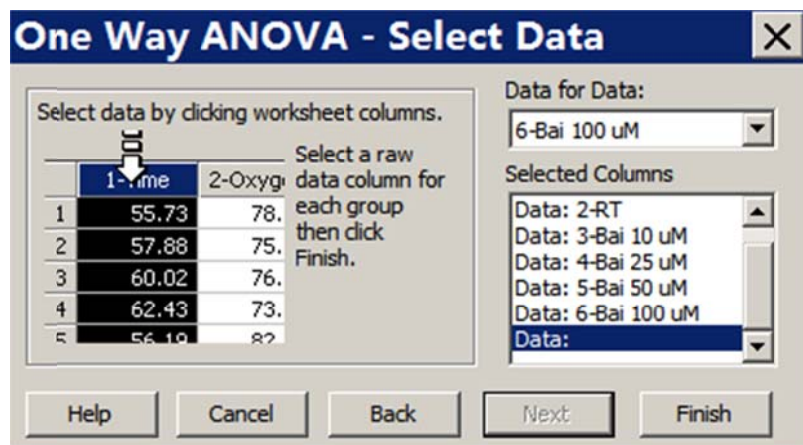

### Multiple Comparison Options

Treatments are significantly different:  
P(Factor A) = <0.001

Select Factors to Compare  
 Factor A

Suggested Test: **Student-Newman-Keuls**

Description  
The SNK Test is used for all pairwise comparisons of the mean responses among the different treatment groups. The SNK Test is less conservative than the Tukey test, i.e., it is more likely to declare an observed difference statistically significant.

Comparison Type  
 All Pairwise  
 Versus Control

Help Cancel Back Next Finish

Data source: Data 1 in Notebook1

Normality Test (Shapiro-Wilk) Passed (P = 0.312)

Equal Variance Test: Passed (P = 0.674)

| Group Name | N | Missing | Mean  | Std Dev | SEM     |
|------------|---|---------|-------|---------|---------|
| Cont.      | 5 | 0       | 0.870 | 0.00865 | 0.00387 |
| RT         | 5 | 0       | 0.545 | 0.00921 | 0.00412 |
| Bai 10 uM  | 5 | 0       | 0.649 | 0.0110  | 0.00493 |
| Bai 25 uM  | 5 | 0       | 0.915 | 0.0215  | 0.00960 |
| Bai 50 uM  | 5 | 0       | 0.998 | 0.0137  | 0.00613 |
| Bai 100 uM | 5 | 0       | 1.192 | 0.0135  | 0.00605 |

| Source of Variation | DF | SS      | MS       | F        | P      |
|---------------------|----|---------|----------|----------|--------|
| Between Groups      | 5  | 1.379   | 0.276    | 1487.610 | <0.001 |
| Residual            | 24 | 0.00445 | 0.000185 |          |        |
| Total               | 29 | 1.384   |          |          |        |

The differences in the mean values among the treatment groups are greater than would be expected by chance; there is a statistically significant difference (P = <0.001).

Power of performed test with alpha = 0.050: 1.000

All Pairwise Multiple Comparison Procedures (Student-Newman-Keuls Method):

Comparisons for factor:

| Comparison               | Diff of Means | p | q       | P      | P<0.050 |
|--------------------------|---------------|---|---------|--------|---------|
| <u>Bai 100 uM vs. RT</u> | 0.646         | 6 | 106.148 | <0.001 | Yes     |
| Bai 100 uM vs. Bai 10 uM | 0.543         | 5 | 89.201  | <0.001 | Yes     |
| Bai 100 uM vs. Cont.     | 0.322         | 4 | 52.910  | <0.001 | Yes     |
| Bai 100 uM vs. Bai 25 uM | 0.277         | 3 | 45.487  | <0.001 | Yes     |
| Bai 100 uM vs. Bai 50 uM | 0.194         | 2 | 31.858  | <0.001 | Yes     |
| <u>Bai 50 uM vs. RT</u>  | 0.452         | 5 | 74.290  | <0.001 | Yes     |
| Bai 50 uM vs. Bai 10 uM  | 0.349         | 4 | 57.344  | <0.001 | Yes     |
| Bai 50 uM vs. Cont.      | 0.128         | 3 | 21.052  | <0.001 | Yes     |
| Bai 50 uM vs. Bai 25 uM  | 0.0830        | 2 | 13.630  | <0.001 | Yes     |
| <u>Bai 25 uM vs. RT</u>  | 0.369         | 4 | 60.661  | <0.001 | Yes     |
| Bai 25 uM vs. Bai 10 uM  | 0.266         | 3 | 43.714  | <0.001 | Yes     |
| Bai 25 uM vs. Cont.      | 0.0452        | 2 | 7.422   | <0.001 | Yes     |
| <u>Cont. vs. RT</u>      | 0.324         | 3 | 53.238  | <0.001 | Yes     |
| Cont. vs. Bai 10 uM      | 0.221         | 2 | 36.291  | <0.001 | Yes     |
| <u>Bai 10 uM vs. RT</u>  | 0.103         | 2 | 16.947  | <0.001 | Yes     |

the exact P values are not provided
